# Supplementary material
Source: PubMed Central journal article supplement (PMC4180521)
Supplement: NIHMS620852-supplement-Supplemental_Table.pdf [file NIHMS620852-supplement-Supplemental_Table.pdf]

**Supplementary Table 1. Total percentage of abnormal Paneth cells in 250 crypt analysis from resection specimens versus virtual biopsies.**

| <b>Case</b> | <b>250 crypts</b> | <b>10 crypts</b> | <b>20 crypts</b> | <b>30 crypts</b> | <b>40 crypts</b> | <b>50 crypts</b> | <b>60 crypts</b> |
|-------------|-------------------|------------------|------------------|------------------|------------------|------------------|------------------|
| 1           | <b>39.19</b>      | 42.65            | 34.72            | 45.74            | 45.34            | 45.32            | 41.07            |
| 2           | <b>25.3</b>       | 28.89            | 31.96            | 24.39            | 19.11            | 32.10            | 22.08            |
| 3           | <b>11.63</b>      | 11.9             | 10.17            | 8.04             | 14.29            | 12.57            | 13.28            |
| 4           | <b>8.09</b>       | 6.52             | 7.07             | 11.76            | 7.07             | 8.40             | 9.22             |
| 5           | <b>8.27</b>       | 2.17             | 5.56             | 4.64             | 12.23            | 4.67             | 6.83             |
| 6           | <b>17.08</b>      | 9.09             | 17.08            | 16.67            | 15.65            | 16.85            | 13.82            |
| 7           | <b>9.46</b>       | 6.90             | 6.20             | 10.49            | 9.50             | 10.12            | 8.74             |
| 8           | <b>13.46</b>      | 22.00            | 8.00             | 12.7             | 9.09             | 11.52            | 10.67            |
| 9           | <b>13.03</b>      | 12.73            | 22.34            | 17.81            | 13.5             | 12.84            | 14.79            |
| 10          | <b>10</b>         | 3.28             | 10.34            | 3.06             | 16.01            | 17.36            | 9.83             |
| 11          | <b>5.6</b>        | 9.09             | 6.45             | 6.19             | 8.82             | 6.47             | 6.85             |
| 12          | <b>8.03</b>       | 3.64             | 5.00             | 6.02             | 11.79            | 7.22             | 10.61            |
| 13          | <b>15.72</b>      | 20.00            | 6.90             | 18.06            | 12.56            | 23.45            | 13.65            |
| 14          | <b>72.63</b>      | 88.23            | 77.38            | 84.44            | 80.1             | 78.24            | 77.22            |
| 15          | <b>8.27</b>       | 8.51             | 7.92             | 9.64             | 11.27            | 11.57            | 8.78             |
| 16          | <b>38.25</b>      | 42.00            | 45.16            | 28.93            | 33.76            | 43.62            | 45.19            |
| 17          | <b>19.88</b>      | 20.45            | 16.05            | 13.25            | 15.35            | 16.52            | 23.05            |
| 18          | <b>11.59</b>      | 12.12            | 8.33             | 3.80             | 11.27            | 15.23            | 8.84             |
| 19          | <b>33.65</b>      | 30.77            | 28.36            | 44.25            | 52.47            | 23.74            | 25.00            |
| 20          | <b>33.48</b>      | 26.23            | 57.14            | 33.06            | 33.97            | 28.03            | 27.52            |
| 21          | <b>4.52</b>       | 5.71             | 5.84             | 5.77             | 4.44             | 5.08             | 5.34             |
| 22          | <b>4.71</b>       | 10.53            | 0.00             | 4.00             | 1.57             | 5.75             | 2.16             |
| 23          | <b>32.77</b>      | 32.56            | 15.33            | 32.75            | 34.78            | 41.64            | 17.81            |
| 24          | <b>46.23</b>      | 53.45            | 40.71            | 40.33            | 45.56            | 61.21            | 43.15            |
| 25          | <b>25.1</b>       | 17.91            | 17.20            | 34.00            | 21.40            | 38.06            | 24.46            |
| 26          | <b>76.59</b>      | 96.43            | 89.25            | 59.29            | 72.28            | 62.75            | 91.67            |
| 27          | <b>8.32</b>       | 14.28            | 11.70            | 12.10            | 8.49             | 7.95             | 5.71             |
| 28          | <b>13.72</b>      | 7.29             | 11.49            | 19.19            | 16.87            | 11.87            | 12.24            |
| 29          | <b>7.59</b>       | 5.49             | 4.92             | 8.70             | 11.96            | 8.83             | 6.47             |
| 30          | <b>10.42</b>      | 4.61             | 15.38            | 11.46            | 8.79             | 9.38             | 9.28             |
| 31          | <b>8.68</b>       | 6.00             | 9.76             | 8.96             | 14.88            | 9.70             | 11.79            |
| 32          | <b>8.84</b>       | 15.91            | 9.35             | 5.13             | 8.79             | 8.02             | 9.42             |
| 33          | <b>12.44</b>      | 7.84             | 4.92             | 11.17            | 6.38             | 9.41             | 9.00             |
| 34          | <b>6.19</b>       | 7.89             | 1.64             | 1.67             | 10.38            | 2.08             | 7.63             |
| 35          | <b>8.72</b>       | 9.38             | 9.00             | 4.80             | 6.25             | 11.33            | 7.65             |
| 36          | <b>30.87</b>      | 29.41            | 35.71            | 37.65            | 24.07            | 41.86            | 25.51            |
| 37          | <b>11.84</b>      | 22.58            | 16.13            | 8.72             | 14.45            | 14.56            | 14.95            |
| 38          | <b>7.17</b>       | 14.58            | 9.17             | 8.22             | 7.28             | 8.24             | 6.58             |

|    |              |       |       |       |       |       |       |
|----|--------------|-------|-------|-------|-------|-------|-------|
| 39 | <b>16.27</b> | 27.59 | 9.77  | 9.52  | 27.18 | 26.72 | 17.98 |
| 40 | <b>5.29</b>  | 0.00  | 6.14  | 11.43 | 2.47  | 2.75  | 4.46  |
| 41 | <b>6.62</b>  | 9.86  | 7.32  | 10.71 | 6.17  | 5.71  | 7.37  |
| 42 | <b>8.22</b>  | 7.50  | 3.70  | 5.65  | 14.08 | 4.75  | 8.88  |
| 43 | <b>5.63</b>  | 10.71 | 5.77  | 9.71  | 5.61  | 2.55  | 9.23  |
| 44 | <b>5.98</b>  | 1.64  | 3.00  | 5.67  | 6.55  | 8.78  | 7.19  |
| 45 | <b>8.64</b>  | 3.70  | 5.95  | 4.78  | 7.29  | 12.59 | 9.83  |
| 46 | <b>5.39</b>  | 8.00  | 7.27  | 2.40  | 5.54  | 5.21  | 6.27  |
| 47 | <b>8.62</b>  | 8.43  | 17.27 | 6.37  | 8.36  | 6.97  | 6.11  |
| 48 | <b>2.92</b>  | 1.30  | 3.11  | 3.33  | 0.49  | 1.78  | 3.07  |
| 49 | <b>9.09</b>  | 13.41 | 10.26 | 7.69  | 9.79  | 9.51  | 10.72 |
| 50 | <b>5.36</b>  | 1.30  | 3.45  | 4.27  | 5.14  | 4.55  | 2.61  |
| 51 | <b>17.97</b> | 12.12 | 16.55 | 25.37 | 14.29 | 20.00 | 12.07 |
| 52 | <b>41.89</b> | 60.61 | 34.45 | 22.45 | 27.86 | 41.09 | 34.55 |
| 53 | <b>19.21</b> | 17.07 | 24.73 | 17.29 | 22.97 | 19.30 | 21.67 |
| 54 | <b>27.42</b> | 12.73 | 24.05 | 24.14 | 23.89 | 11.02 | 21.05 |
| 55 | <b>7.5</b>   | 2.35  | 6.06  | 11.42 | 5.65  | 8.03  | 7.45  |
| 56 | <b>44.81</b> | 30.77 | 60.32 | 28.57 | 66.15 | 49.71 | 53.4  |
| 57 | <b>5.16</b>  | 6.98  | 6.08  | 5.19  | 4.19  | 3.47  | 6.15  |
| 58 | <b>3.8</b>   | 2.08  | 0.93  | 2.80  | 1.20  | 6.64  | 5.47  |
| 59 | <b>9.3</b>   | 3.85  | 4.17  | 12.32 | 12.02 | 5.06  | 7.33  |
| 60 | <b>5.22</b>  | 2.27  | 7.05  | 2.75  | 3.85  | 3.29  | 4.76  |
| 61 | <b>47.52</b> | 23.33 | 62.14 | 55.43 | 59.92 | 69.72 | 69.35 |
| 62 | <b>7.22</b>  | 0.00  | 3.96  | 2.63  | 6.04  | 3.13  | 10.44 |
| 63 | <b>6.48</b>  | 8.86  | 9.52  | 4.74  | 5.06  | 2.03  | 6.02  |
| 64 | <b>10.08</b> | 5.08  | 7.41  | 6.09  | 10.59 | 11.32 | 12.38 |
| 65 | <b>11.3</b>  | 9.88  | 14.92 | 5.46  | 10.89 | 9.58  | 5.47  |
| 66 | <b>41.2</b>  | 19.12 | 23.91 | 37.12 | 31.56 | 52.08 | 38.52 |
| 67 | <b>6.53</b>  | 1.25  | 4.71  | 9.17  | 8.84  | 8.22  | 5.75  |
| 68 | <b>7.36</b>  | 4.29  | 5.67  | 4.39  | 4.06  | 11.76 | 12.32 |
| 69 | <b>17.07</b> | 7.14  | 20.00 | 21.64 | 20.35 | 27.87 | 13.54 |
| 70 | <b>19.24</b> | 21.43 | 4.94  | 19.14 | 11.99 | 12.17 | 19.05 |
| 71 | <b>10.17</b> | 13.79 | 15.84 | 12.82 | 10.95 | 10.98 | 11.08 |
| 72 | <b>14.03</b> | 3.03  | 15.53 | 20.9  | 22.49 | 21.55 | 18.64 |
| 73 | <b>19.84</b> | 12.00 | 22.22 | 33.12 | 16.74 | 16.51 | 20.33 |
| 74 | <b>37.73</b> | 41.67 | 28.13 | 32.89 | 34.85 | 27.27 | 54.8  |
| 75 | <b>28.27</b> | 37.5  | 28.71 | 22.41 | 30.91 | 28.74 | 31.29 |
| 76 | <b>22.85</b> | 50.00 | 42.01 | 15.3  | 12.71 | 26.22 | 35.87 |
| 77 | <b>8.83</b>  | 7.25  | 6.12  | 9.02  | 8.22  | 10.36 | 7.43  |
| 78 | <b>8.53</b>  | 12.12 | 10.00 | 3.70  | 8.77  | 15.58 | 6.56  |
| 79 | <b>7.63</b>  | 9.09  | 7.45  | 10.00 | 7.09  | 7.26  | 2.86  |
| 80 | <b>12.62</b> | 9.09  | 14.74 | 15.92 | 5.92  | 15.38 | 13.81 |
| 81 | <b>6.6</b>   | 2.60  | 2.73  | 7.32  | 5.73  | 4.08  | 4.84  |
| 82 | <b>5.44</b>  | 2.47  | 7.20  | 3.00  | 6.32  | 6.50  | 7.39  |
| 83 | <b>12.03</b> | 10.53 | 11.02 | 8.46  | 9.96  | 10.49 | 9.29  |

|    |              |       |       |       |       |       |       |
|----|--------------|-------|-------|-------|-------|-------|-------|
| 84 | <b>10.03</b> | 12.5  | 16.92 | 11.92 | 10.45 | 11.64 | 10.42 |
| 85 | <b>16.02</b> | 26.00 | 9.9   | 12.39 | 16.44 | 15.09 | 10.89 |
